# Supplementary material
Source: PubMed Central journal article supplement (PMC3627669)
Supplement: auto-9-538-s01.pdf [file auto-9-538-s01.pdf]

## **Supplemental Material to:**

**Zhibing Duan, Yixiong Chen, Wei Huang, Yanfang Shang,  
Peilin Chen and Chengshu Wang**

**Linkage of autophagy to fungal development, lipid  
storage and virulence in *Metarhizium robertsii***

**Autophagy 2013; 9(4)**

**<http://dx.doi.org/10.4161/auto.23575>**

**[www.landesbioscience.com/journals/autophagy/article/23575](http://www.landesbioscience.com/journals/autophagy/article/23575)**

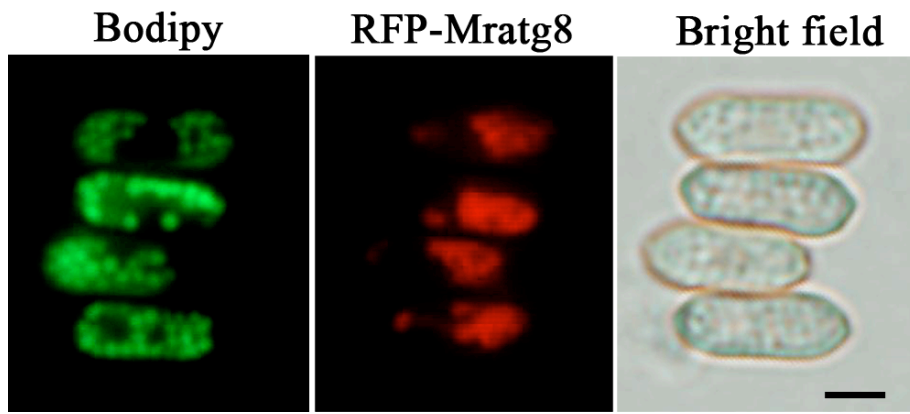

**Figure S1. MrAtg8 is not localized on the lipid droplets (LDs).** The conidia of RFP-Mratg8 (wild-type strain transformed with an *RFP-MrATG8* fused gene) were stained with the LD-specific fluorescent dye, Bodipy. The stained LDs and RFP-labeled MrAtg8 showed different patterns. Bar, 5  $\mu$ m.

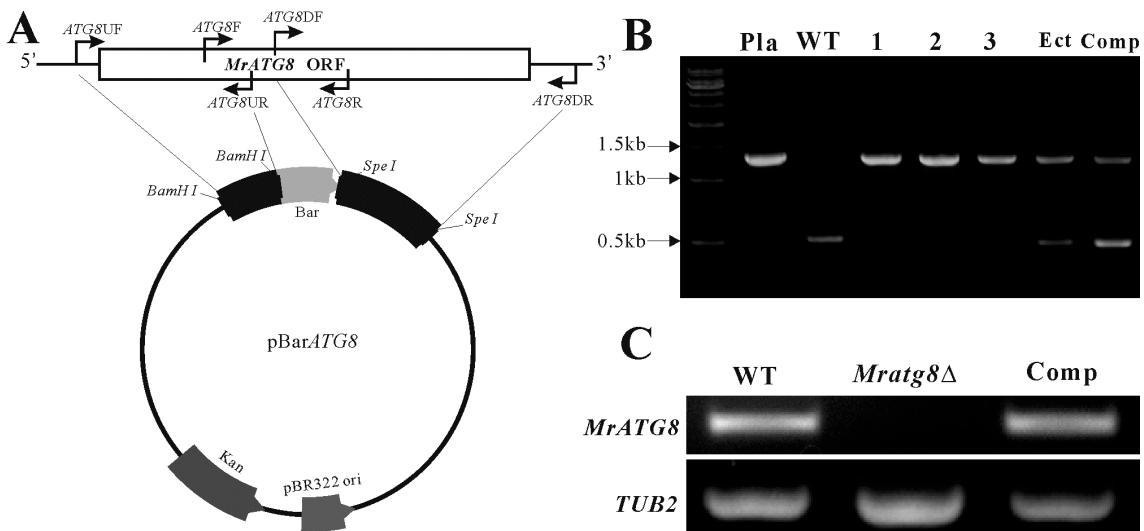

**Figure S2. *MrATG8* gene disruption and verification.** (A) Construction of the vector pBarATG8 for homologous gene disruption. (B) Transformants were verified by PCR with primers *ATG8F* and *ATG8R*. Pla, plasmid pBarATG8 DNA used as a template; WT, wild type; Lanes 1, 2 and 3 amplified from three independent null mutants; Ect, ectopically integrated transformant with two bands; Comp, complemented mutant acquired by transforming *Mratg8* $\Delta$  with the *MrATG8* gene. (C) RT-PCR verification of *MrATG8* transcripts. Lane 1, wild type (WT); Lane 2, *Mratg8* $\Delta$ ; Lane 3, *Mratg8* $\Delta$  complemented transformant with the *MrATG8* gene. *TUB2*, tubulin beta-2 gene used as a reference.

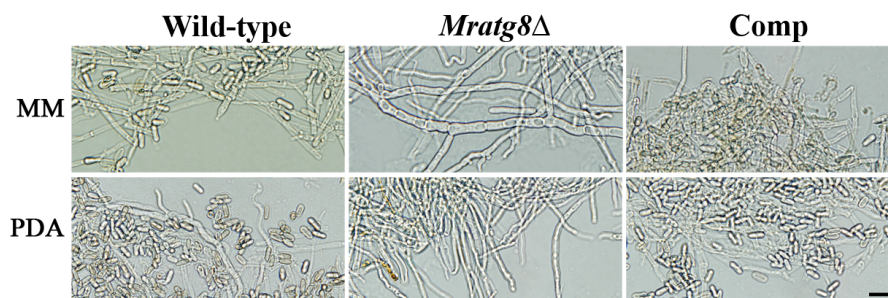

**Figure S3. Differences of conidial formation.** In contrast to the wild-type and complemented mutant (Comp), *Mratg8Δ* failed to produce conidia either on the nutrient-rich potato dextrose agar (PDA) or the nutrient-poor minimal medium (MM). Bar, 15  $\mu\text{m}$ .

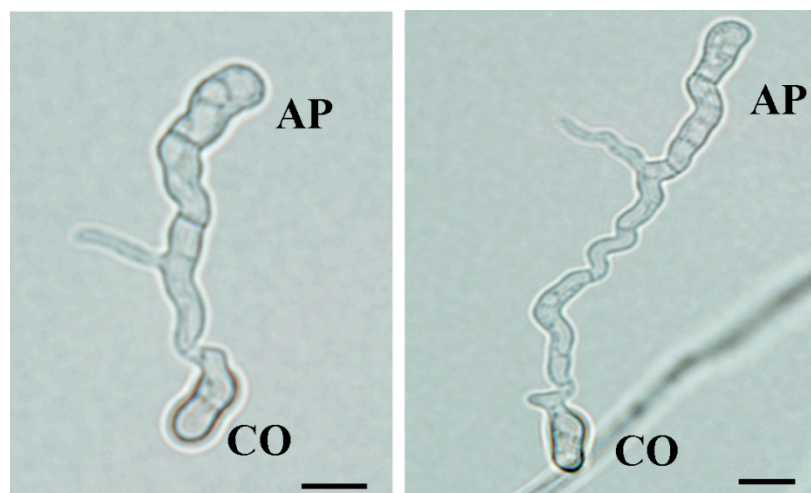

**Figure S4. Appressorium production by the M8-3 mutant on a hydrophobic surface.** When compared to the wild type (Left, a differentiation rate at 88.4%), the mutant could similarly form appressoria (Right, 82.22%) on a hydrophobic surface. CO, conidium; AP, appressorium. Bar, 5  $\mu\text{m}$ .

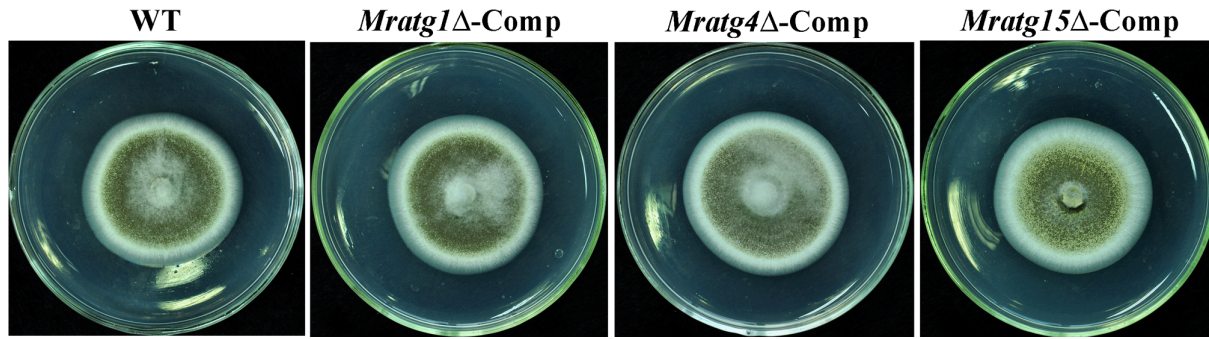

**Figure S5. Phenotyping of *Mratg1*Δ, *Mratg4*Δ and *Mratg15*Δ complemented with corresponding genes grown on PDA medium.** The cultures were grown on the medium for 10 days.

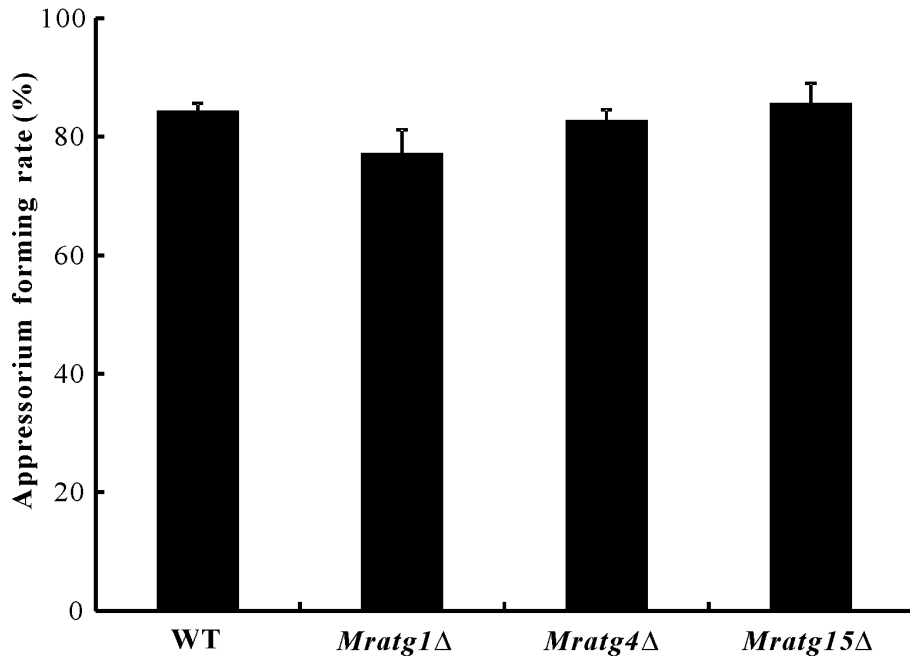

**Figure S6. Appressorium production by the wild type and different gene deletion mutants.** Conidia of the wild type (WT), *Mratg1*Δ, *Mratg4*Δ and *Mratg15*Δ harvested after incubation for 20 days on CM plates were subjected to appressorial induction for 16 h on a hydrophobic surface (sterile plastic petri dishes of six cm diameter containing 3 ml of 0.0125% yeast extract). No significant differences were detected between different strains ( $P > 0.05$ ).

**Table S1.** List of oligonucleotide primers used in the study.

| <b>Primer</b>  | <b>Sequence (5'- 3')</b>                     | <b>Purpose of use</b>                                            |                                                                 |
|----------------|----------------------------------------------|------------------------------------------------------------------|-----------------------------------------------------------------|
| <i>ATG8UF</i>  | CGGGATCCGTGACTACAGAGTAGCAGGCTGTC             | For deletion and verification of <i>MrATG8</i>                   |                                                                 |
| <i>ATG8UR</i>  | CGGGATCCGATGTCGCTCTTCTCTACCTT                |                                                                  |                                                                 |
| <i>ATG8LF</i>  | GGACTAGTCAGCATCTATGAGGAGCACAAG               |                                                                  |                                                                 |
| <i>ATG8LR</i>  | GGACTAGTGCAGTCTGGTAGAGTCCGGTAT               |                                                                  |                                                                 |
| <i>ATG8F</i>   | TGAAAAGCGTAAGGCTGAGG                         |                                                                  |                                                                 |
| <i>ATG8R</i>   | CCGAGTAGGTGATGTAGAGGAATC                     |                                                                  |                                                                 |
| <i>TUBF</i>    | GATCTTGAACCTGGCACCAT                         | For RT-PCR internal control                                      |                                                                 |
| <i>TUBR</i>    | CCATGAAGAAGTGCAGACGA                         |                                                                  |                                                                 |
| A8XbU          | GCTCTAGACCGAGCATTTCAGTCATCATGCGAAG           | Mratg8 C-terminal amino acid mutations                           |                                                                 |
| A8XbD          | GCTCTAGATTACGCGGTGCCAAAAGTGTTTTTCG           |                                                                  |                                                                 |
| A8XbD1         | GCTCTAGATTACGCGGTGCCAAAAGTGTTTTTCG           |                                                                  |                                                                 |
| A8XbD2         | GCTCTAGATTACGCGGTAAAAGTGTTTTTCG              |                                                                  |                                                                 |
| A8XbD3         | GCTCTAGATTAGCCAAAAGTGTTTTTCGCCC              |                                                                  |                                                                 |
| A8XbD4         | GCTCTAGA TTAGGCAAAAAGTGTTTTTCGCCC            |                                                                  |                                                                 |
| A8XbD5         | GCTCTAGA TTA AAAAGTGTTTTTCGCCC GAG           |                                                                  |                                                                 |
| RfpXbF         | GCTCTAGAGCAGGAATTCATGGCCTCCTCCGAG            | For RFP-Mratg8 fusion                                            |                                                                 |
| RfA81          | CGTCCTTGAACCTTGCTTCGCATGGCGCCGGTGGAGTGGCGGC  |                                                                  |                                                                 |
| RfA82          | GCCGCCACTCCACCGGCGCCATGCGAAGCAAGTTC AAGGACG  | For Mratg8-RFP fusion                                            |                                                                 |
| A8Rf1          | GACGTCCTCGGAGGAGGCCATCGCGGTGCCAAAAGTGTTTTTCG |                                                                  |                                                                 |
| A8Rf2          | CGAAAACACTTTTGGCACCGCGATGGCCTCCTCCGAGGACGTC  |                                                                  |                                                                 |
| RfpXbR         | GCTCTAGATTAGGCGCCGGTGGAGTGGCG                |                                                                  |                                                                 |
| <i>ATG1UF</i>  | AACTGCAGACTCATTTCACAGACGCATCC                | For deletion, verification and complementation of <i>MrATG1</i>  |                                                                 |
| <i>ATG1UR</i>  | AACTGCAGTCAGTACTGGTAACGGTAAGAGG              |                                                                  |                                                                 |
| <i>ATG1LF</i>  | GGACTAGTGAGATCCCTGGATTAGTGG AAGAC            |                                                                  |                                                                 |
| <i>ATG1LR</i>  | GGACTAGTCTGTCTAGCTCACTGCTAGCTTCT             |                                                                  |                                                                 |
| <i>ATG1F</i>   | GCGAACTAGGAGACCTGTGCG                        |                                                                  |                                                                 |
| <i>ATG1R</i>   | GGAGTTC AACGTGGTTTCGT                        |                                                                  |                                                                 |
| <i>ATG1CF</i>  | GGACTAGTCCCTTATCACGCTTCCTC                   |                                                                  |                                                                 |
| <i>ATG1CR</i>  | GGACTAGTGTTCCCTATCACAAGTCCAA                 |                                                                  |                                                                 |
| <i>ATG4UF</i>  | CGGGATCCTGGAATGGACCATGTAGTGAG                |                                                                  | For deletion, verification and complementation of <i>MrATG4</i> |
| <i>ATG4UR</i>  | CGGGATCCGACAGAGACAAAGCTGATGCTG               |                                                                  |                                                                 |
| <i>ATG4LF</i>  | GGACTAGTCGCTACTGCTCGTTGTATCCAGTA             |                                                                  |                                                                 |
| <i>ATG4LR</i>  | GGACTAGTCCTAAGCTAAGCAGCCAGATTC               |                                                                  |                                                                 |
| <i>ATG4F</i>   | CAGCATCAGCTTTGTCTCTGTC                       |                                                                  |                                                                 |
| <i>ATG4R</i>   | ATGCCCAGTCTCGTTCCTACTA                       |                                                                  |                                                                 |
| <i>ATG4CF</i>  | GGACTAGTTTTCTGCTGCCCTGTTGG                   |                                                                  |                                                                 |
| <i>ATG4CR</i>  | GGACTAGTCCTGAAGGCTGCGATGTT                   |                                                                  |                                                                 |
| <i>ATG15UF</i> | CGGAATTCGCTCGCTCTTTGAATGT                    | For deletion, verification and complementation of <i>MrATG15</i> |                                                                 |
| <i>ATG15UR</i> | CGGGATCCTTG CAGGTGCCAATGTAG                  |                                                                  |                                                                 |
| <i>ATG15LF</i> | GCTCTAGATACAGGAGTCACGGCTACG                  |                                                                  |                                                                 |
| <i>ATG15LR</i> | CGAGCTCAACCAACATCACAGAGGGA                   |                                                                  |                                                                 |
| <i>ATG15F</i>  | TTCTGATCCCAAAGCTCCT                          |                                                                  |                                                                 |
| <i>ATG15R</i>  | ATCCGAGGTTGTAGTGATA                          |                                                                  |                                                                 |
| <i>ATG15CF</i> | GCTCTAGAATGAGGGTGTCTAG AAGAGG                |                                                                  |                                                                 |
| <i>ATG15CR</i> | GCTCTAGAAACCAACATCACAGAGGGAGT                |                                                                  |                                                                 |
| <i>MPLIF</i>   | GAACCTCCCTTCTTTCACC                          | For RT-PCR analysis of <i>MPL1</i> gene                          |                                                                 |
| <i>MPLIR</i>   | CCTTGGCATTGGCATAGACT                         |                                                                  |                                                                 |

**Table S2.** Comparison of autophagy-related genes encoded in the genomes of *S. cerevisiae*, *M. oryzae* and *M. robertsii*.

| Function*                                           | Gene symbols | <i>S. cerevisiae</i> | <i>M. oryzae</i> | <i>M. robertsii</i> |
|-----------------------------------------------------|--------------|----------------------|------------------|---------------------|
| <b>Atg1 kinase and its regulators</b>               | ATG1         | NP_011335.1          | MGG_06393        | <b>MAA_03501</b>    |
|                                                     | ATG13        | NP_015511.1          | MGG_00454        | MAA_02276           |
|                                                     | ATG17        | NP_013527.1          | MGG_07667        | MAA_07123           |
|                                                     | ATG29        | NP_015159.1          | MGG_02790        | MAA_08445           |
|                                                     | ATG31        | NP_010305.1          | None             | None                |
| <b>PtdIns 3-kinase complex</b>                      | ATG6         | NP_015205.1          | MGG_03694        | MAA_00746           |
|                                                     | ATG14        | NP_009686.1          | None             | None                |
| <b>Atg12 conjugation system</b>                     | ATG5         | NP_015176.1          | MGG_09262        | MAA_02911           |
|                                                     | ATG7         | NP_012041.1          | MGG_07297        | MAA_03074           |
|                                                     | ATG10        | NP_013058.1          | None             | None                |
|                                                     | ATG12        | NP_009776.1          | MGG_00598        | MAA_02068           |
|                                                     | ATG16        | NP_013882.1          | MGG_05255        | MAA_08906           |
| <b>Atg8 conjugation system</b>                      | ATG3         | NP_014404.1          | MGG_02959        | MAA_03709           |
|                                                     | ATG4         | NP_014176.2          | MGG_03580        | <b>MAA_04475</b>    |
|                                                     | ATG7         | NP_012041.1          | MGG_07297        | MAA_03074           |
|                                                     | ATG8         | NP_009475.1          | MGG_01062        | <b>MAA_02674</b>    |
| <b>Atg2-Atg18 complex</b>                           | ATG2         | NP_014157.1          | MGG_05998        | MAA_03175           |
|                                                     | ATG18        | NP_444297.1          | MGG_03139        | MAA_05300           |
| <b>Cytoplasm to vacuole targeting (Cvt) pathway</b> | ATG9         | NP_010132.1          | MGG_09559        | MAA_04484           |
|                                                     | ATG11        | NP_015374.1          | MGG_04486        | MAA_04312           |
|                                                     | ATG19        | NP_014559.1          | None             | None                |
|                                                     | ATG20        | NP_010170.1          | MGG_12832        | MAA_05815           |
|                                                     | ATG21        | NP_015225.1          | MGG_03088        | MAA_010306          |
|                                                     | ATG23        | NP_013535.1          | None             | None                |
|                                                     | ATG24        | NP_012498.1          | MGG_03638        | MAA_05264           |
|                                                     | ATG27        | NP_012357.2          | MGG_02386        | MAA_01720           |
| <b>Pexophagy</b>                                    | ATG11        | NP_015374.1          | MGG_04486        | MAA_04312           |
|                                                     | ATG25        | None                 | None             | None                |
|                                                     | ATG26        | NP_013290.1          | MGG_03459        | MAA_06719           |
|                                                     | ATG28        | None                 | None             | None                |
|                                                     | ATG30        | None                 | None             | None                |
| <b>Mitophagy</b>                                    | ATG32        | NP_012120.1          | None             | None                |
|                                                     | ATG33        | NP_013460.1          | None             | None                |
| <b>Autophagic degradation and recycle</b>           | ATG15        | NP_009994.2          | MGG_12828        | <b>MAA_00506</b>    |
|                                                     | ATG22        | NP_009892.1          | MGG_09904        | MAA_08468           |
| <b>Others</b>                                       | ATG34        | NP_014558.1          | None             | None                |

\*, functional grouping is based on the information acquired from the autophagy database (<http://tp-apg.genes.nig.ac.jp/autophagy/index.html>). The genes of *M. robertsii* highlighted in bold were deleted in this study for functional studies.
